# Supplementary material for: The Contributory Role of Cell Blocks in Salivary Gland Neoplasms Fine Needle Aspirations Classified by the Milan System for Reporting Salivary Gland Cytology
Source: MDPI journal article supplement (doi:10.3390/diagnostics11101778), 2021-09-27
Supplement: s1 [file s1]

# The Contributory Role of Cell Blocks in Salivary Gland Neoplasms Fine Needle Aspirations Classified by Milan System for Reporting Salivary Gland Cytology

Erkka Tommola <sup>1,2</sup>, David Kalfert <sup>3</sup>, Heli Hakso-Mäkinen <sup>1</sup> and Ivana Kholová <sup>1,2,\*</sup>

Table S1. Topography of Salivary Gland Fine-Needle Aspirations.

| MSRSGC Category           | Localization  |                     |
|---------------------------|---------------|---------------------|
|                           | Parotid Gland | Submandibular Gland |
| Non-Diagnostic            | 42 (76.2)     | 10 (23.8)           |
| Non-Neoplastic            | 3 (66.7)      | 1 (33.3)            |
| AUS                       | 15 (93.3)     | 1 (6.7)             |
| Benign Neoplasm           | 48 (89.6)     | 5 (10.4)            |
| SUMP                      | 21 (71.4)     | 6 (28.6)            |
| Suspicious for Malignancy | 5 (80.0)      | 1 (20.0)            |
| Malignant Neoplasm        | 5 (80.0)      | 1 (20.0)            |
| Total                     | 139 (82.0)    | 25 (18.0)           |

Abbreviations: AUS, Atypia of Undetermined Significance; SUMP, Neoplasm of Uncertain Malignant Potential.

**Table S2.** MSRSGC: Histopathology Diagnoses of Neoplasms.

| MSRSGC Category           | Histopathology Diagnosis of Neoplasms |                                                               |
|---------------------------|---------------------------------------|---------------------------------------------------------------|
|                           | Benign Neoplasm                       | Malignant Neoplasm                                            |
| Non-Diagnostic            | Warthin's tumor (n = 13)              | Extranodal marginal zone B-cell lymphoma, MALT-type (n = 3)   |
|                           | Cystadenoma (n = 4)                   | Adenoid cystic carcinoma (n = 2)                              |
|                           | Basal cell adenoma benign (n = 1)     | Basal cell adenocarcinoma (n = 2)                             |
|                           | Lipoma (n = 1)                        | Burkitt lymphoma (n = 2)                                      |
|                           | Pleomorphic adenoma (n = 1)           | Ductal carcinoma (n = 1)                                      |
| Non-Neoplastic            |                                       | Myoepithelial carcinoma ex PA (n = 1)                         |
|                           |                                       | Squamous cell carcinoma, metastatic site (n = 1)              |
| AUS                       | Warthin's tumor (n = 1)               | Extranodal marginal zone B-cell lymphoma of MALT type (n = 1) |
|                           | Warthin's tumor (n = 5)               | Follicular lymphoma (n = 2)                                   |
|                           | Myoepithelioma (n = 1)                | Adenoid cystic carcinoma (n = 1)                              |
|                           | Basal cell adenoma benign (n = 1)     | Myoepithelial carcinoma ex PA (n = 1)                         |
| Benign Neoplasm           | Pleomorphic adenoma (n = 1)           |                                                               |
|                           | Warthin's tumor (n = 29)              |                                                               |
|                           | Pleomorphic adenoma (n = 22)          |                                                               |
|                           | Myoepithelioma (n = 1)                |                                                               |
| SUMP                      | Oncocytoma (n = 1)                    |                                                               |
|                           | Pleomorphic adenoma (n = 9)           | Carcinoma ex pleomorphic adenoma (n = 3)                      |
|                           | Basal cell adenoma benign (n = 3)     | Acinic cell carcinoma (n = 2)                                 |
|                           | Oncocytoma (n = 2)                    | Adenoid cystic carcinoma (n = 2)                              |
|                           | Eccrine spiradenoma (n = 1)           | Myoepithelial carcinoma ex PA (n = 1)                         |
|                           | Myoepithelioma (n = 1)                |                                                               |
|                           | Oncocytic cystadenoma (n = 1)         |                                                               |
| Suspicious for Malignancy | Warthin's tumor (n = 1)               |                                                               |
|                           |                                       | Myoepithelial carcinoma (n = 2)                               |
|                           |                                       | Leiomyosarcoma, metastatic site (n = 1)                       |
|                           |                                       | Salivary duct carcinoma (n = 1)                               |
| Malignant Neoplasm        |                                       | Squamous cell carcinoma, metastatic site (n = 1)              |
|                           |                                       | Carcinoma ex pleomorphic adenoma (n = 1)                      |
|                           |                                       | Ductal carcinoma (n = 1)                                      |
|                           |                                       | High grade neuroendocrine carcinoma (n = 1)                   |
|                           |                                       | Malignant melanoma, metastatic site (n = 1)                   |
|                           |                                       | Squamous cell carcinoma, basaloid (n = 1)                     |
|                           |                                       | Squamous cell carcinoma, metastatic site (n = 1)              |

Abbreviations: MSRSGC, Milan System for Reporting Salivary Gland Cytopathology; AUS, Atypia of Undetermined Significance; SUMP, Neoplasm of Uncertain Malignant Potential.
